# Supplementary material for: Comparative transcriptome and metabolome provides new insights into the regulatory mechanisms of accelerated senescence in litchi fruit after cold storage
Source: PubMed Central journal article supplement (PMC4725888; doi:10.1038/srep19356), 2016-01-14
Supplement: srep19356-s1.pdf [file srep19356-s1.pdf]

# **Comparison of the litchi transcriptome and metabolome provides new insights into the regulatory mechanisms of accelerated senescence in the fruit after cold storage**

Running title: Accelerated litchi fruit senescence after pre-cold storage.

Ze Yun,<sup>†1</sup> Hongxia Qu,<sup>†1</sup> Hui Wang,<sup>1</sup> Feng Zhu,<sup>2</sup> Zhengke Zhang,<sup>1</sup> Xuewu Duan,<sup>1</sup> Bao Yang,<sup>1</sup> Yunjiang Cheng<sup>2</sup> and Yueming Jiang\*<sup>1</sup>

<sup>1</sup> Key Laboratory of Plant Resources Conservation and Sustainable Utilization, South China Botanical Garden, Chinese Academy of Sciences, Guangzhou 510650, P.R. China

<sup>2</sup> Key Laboratory of Horticultural Plant Biology, Ministry of Education, Huazhong Agricultural University, Wuhan 430070, P.R. China

\*Corresponding author: Yueming Jiang

Email address: ymjiang@scbg.ac.cn

Phone number: +86-2037083042;

Fax number: +86-2037252525

Author Contributions:

<sup>†</sup> Ze Yun and Hongxia Qu contributed equally to this work.

## Supplementary information

**Supplementary Table S1.** Summary of the statistics for sequence data from the litchi fruit pericarp under different storage conditions.

AC fruit after 0 and 4 days of cold storage and PCS fruit after 0, 24 and 48 h at ambient temperature were used to construct two libraries.

One library was paired-end sequenced (expected library size of 200 bp and read length of 100 nucleotides), and the other was single-

read sequenced (expected library size of 200 bp and read length of 40 nt). Each library was sequenced once.

| Summary                   |                      | AC 0 d   |         | AC 4 d   |         | PCS 0 h  |         | PCS 24 h |         | PCS 48 h |         |
|---------------------------|----------------------|----------|---------|----------|---------|----------|---------|----------|---------|----------|---------|
|                           |                      | single   | paired  | single   | paired  | single   | paired  | single   | paired  | single   | paired  |
| Raw Data                  | Total                | 42393892 | 8235846 | 35730419 | 6633639 | 44270771 | 7306256 | 38147766 | 7752975 | 44554246 | 8149186 |
| Clean Reads               | Total number         | 39002380 | 6671035 | 33943898 | 5837602 | 40286401 | 6356442 | 36240377 | 6434969 | 40989906 | 6682332 |
| All Reads Mapping to Gene | Total number         | 37432913 | 5073839 | 31625604 | 4688489 | 38741516 | 5022716 | 33559720 | 5397477 | 39272065 | 5742475 |
| All Reads Mapping to Gene | Total % of clean tag | 95.98    | 76.06   | 93.17    | 80.32   | 96.17    | 79.02   | 92.60    | 83.878  | 95.81    | 85.94   |

Supplementary Figure S1. Litchi pericarp browning in the AC and PCS fruits.

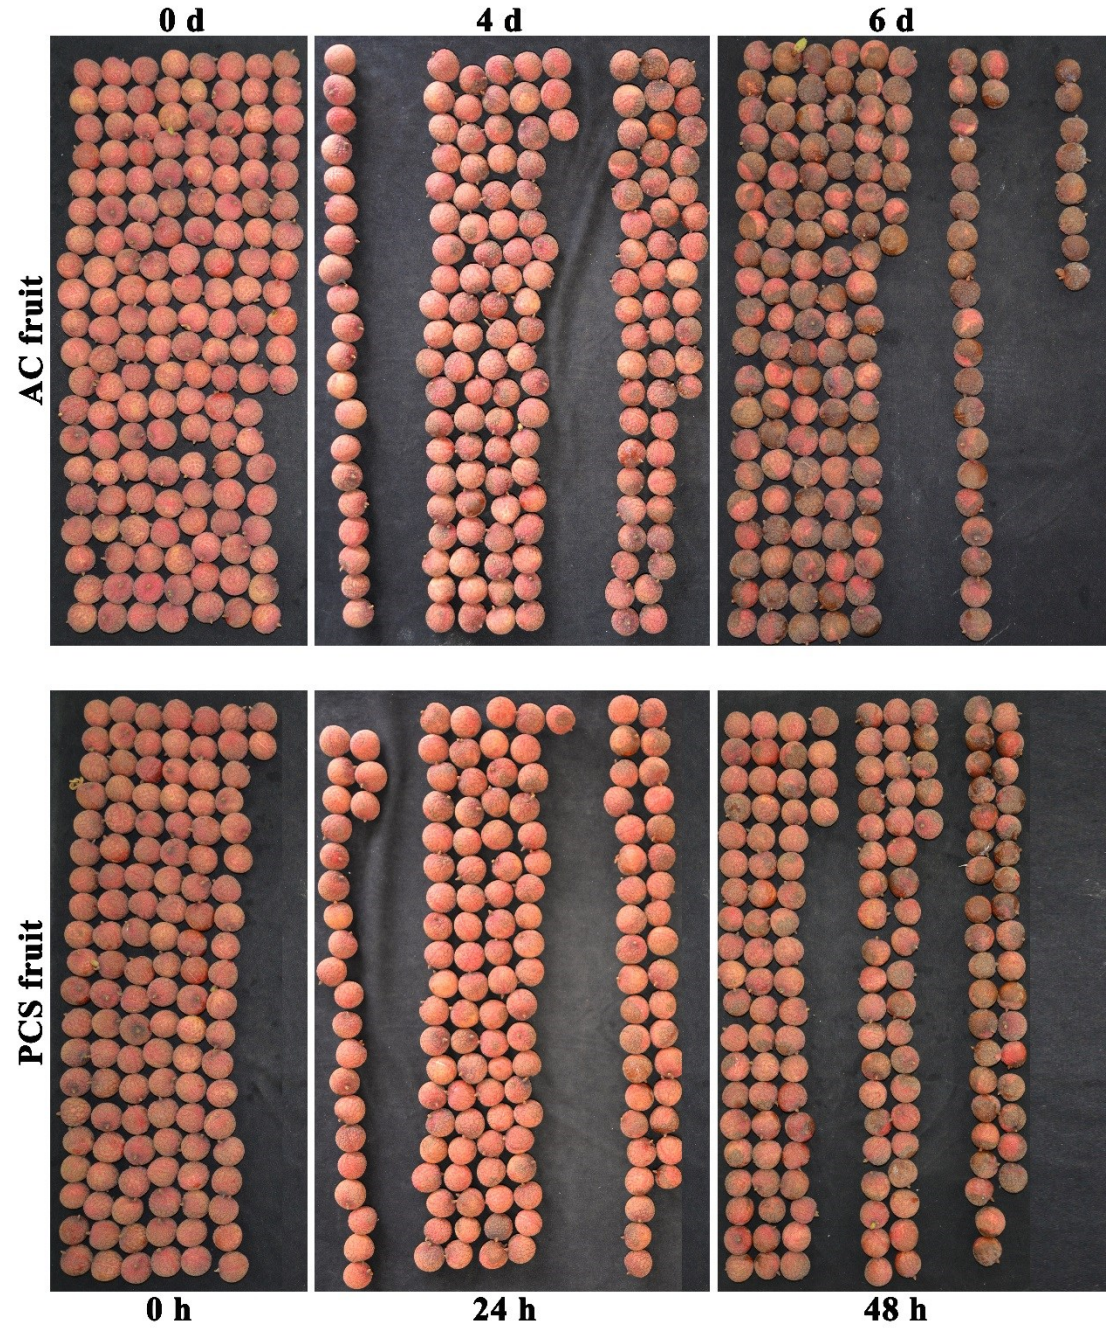

**Supplementary Figure S2.** Graphical output of up-regulated genes related to signal transduction during PCS fruit senescence. GO annotations were performed on DEGs identified in the transcriptome. Up-regulated genes related to signal transduction in the PCS fruit were analysed and visualised as a directed acyclic graph using the BiNGO plugin in Cytoscape. Categories are shown as circles, and the diameters represent the number of genes in each category. Areas coloured deep yellow represent significant nodes, whereas the white areas represent the nodes that are not significant.

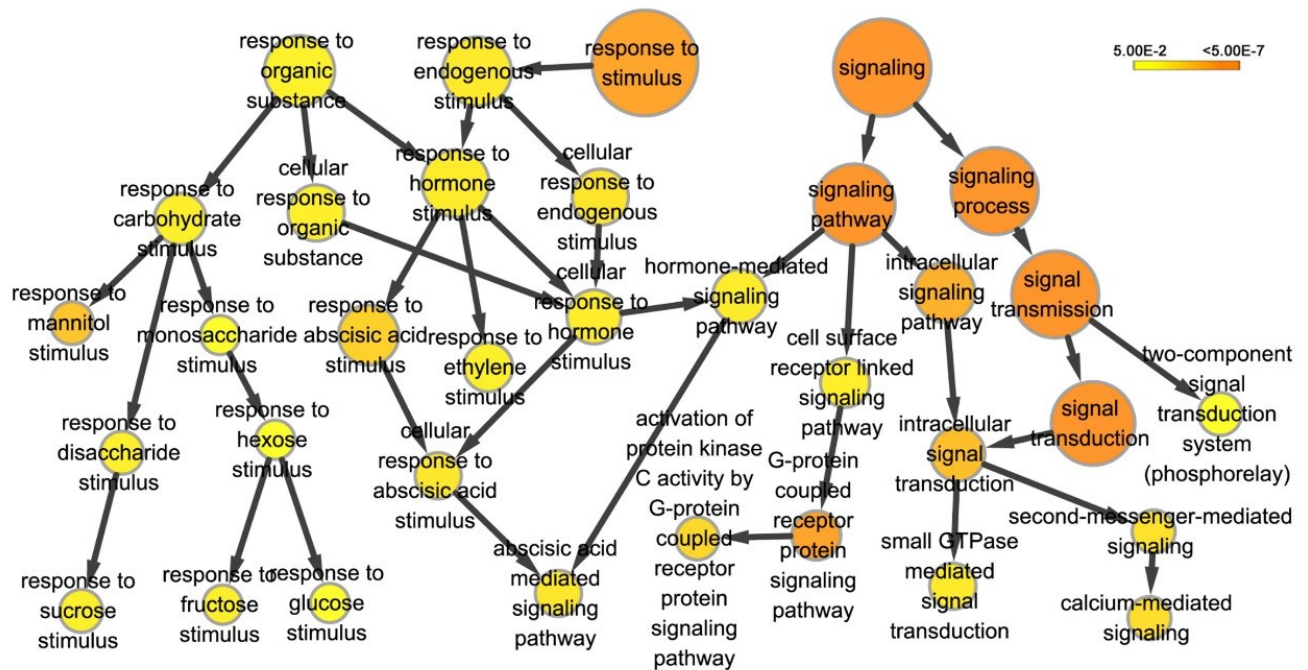







**Supplementary Excel table S1.** DEGs during the senescence of litchi fruit. AC fruits were stored under ambient temperature conditions (approximately 20-25 °C and 75-85% relative humidity) immediately after harvest. After 14 days of cold storage (4 °C and 75-85% relative humidity), PCS fruits were stored under the same ambient temperature conditions mentioned above.
